# Supplementary material
Source: Elsevier journal article supplement (https://www.sciencedirect.com/science/article/pii/S1130239920300626)
Supplement: mmc1 [file S1130239920300626:mmc1.pdf]

## Anexo 1. Cuestionario

Para la extracción de muestras sanguíneas a través de catéteres vasculares, se debe desechar un volumen de sangre anteriormente a la recolección de la muestra para no alterar los resultados. Con esta breve encuesta nos gustaría saber cuál es la cantidad media de sangre desechada en diferentes unidades de cuidados intensivos.

La encuesta es ANÓNIMA. SE GARANTIZA LA CONFIDENCIALIDAD DE LOS DATOS. Contestarla te llevará MENOS 2 DE MINUTOS.

1. ¿Cuánto volumen sanguíneo desechas al realizar una extracción a través de un catéter venoso periférico?
  - a. Nada
  - b. 2 ml
  - c. 5 ml
  - d. 10 ml
  - e. 15 ml
  - f. Otro
2. ¿Cuánto volumen sanguíneo desechas al realizar una extracción a través de una cánula arterial?
  - a. Nada
  - b. 2 ml
  - c. 5 ml
  - d. 10 ml
  - e. 15 ml
  - f. Otro
3. ¿Cuánto volumen sanguíneo desechas al realizar una extracción a través de un catéter central de acceso periférico?
  - a. Nada
  - b. 2 ml
  - c. 5 ml
  - d. 10 ml
  - e. 15 ml
  - f. Otro
4. ¿Cuánto volumen sanguíneo desechas al realizar una extracción a través de un catéter venoso central?
  - a. Nada
  - b. 2 ml
  - c. 5 ml
  - d. 10 ml
  - e. 15 ml
  - f. Otro
5. Sexo
  - a. Mujer
  - b. Hombre
6. Años de experiencia laboral
  - a. <1 año
  - b. De 1 a 5 años
  - c. De 6 a 10 años
  - d. De 11 a 15 años
  - e. De 16 a 20 años
  - f. >20 años
7. Hospital dónde trabajas
8. Si quieres añadir algún comentario

GRACIAS POR TU COLABORACIÓN
